# Supplementary material for: Synthesis and Biochemical Evaluation of Baicalein Prodrugs
Source: MDPI journal article supplement (doi:10.3390/pharmaceutics13091516), 2021-09-19
Supplement: s1 [file s1]

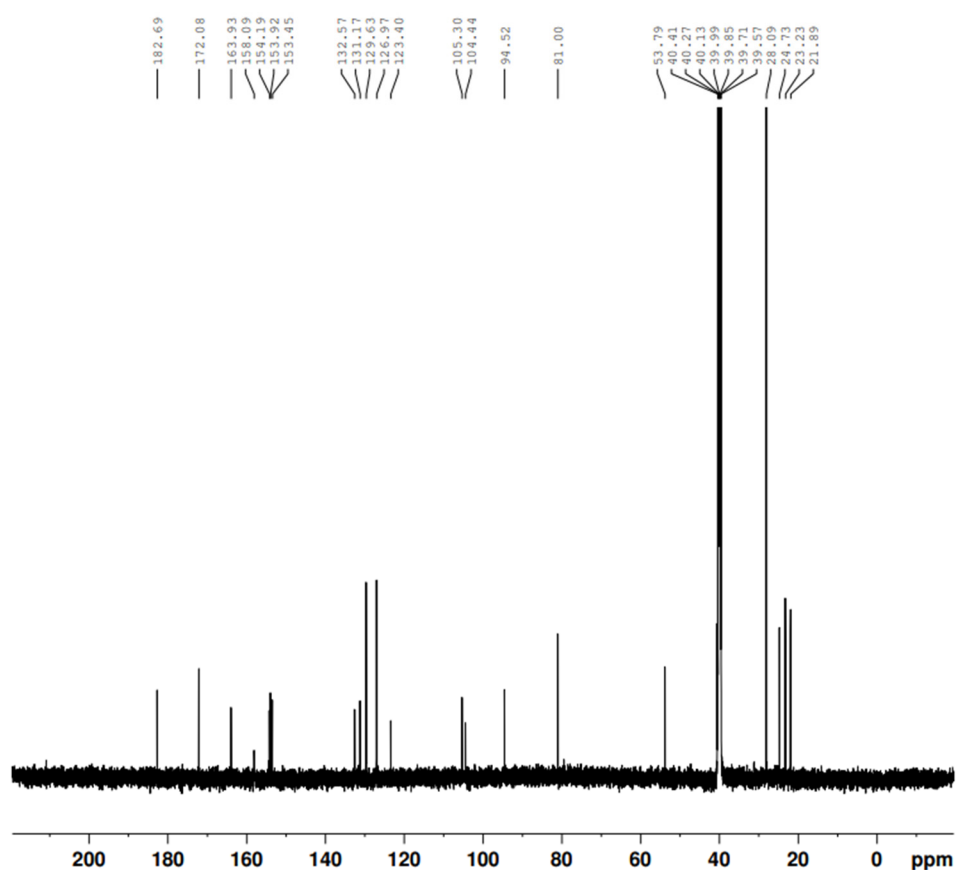

Figure S2.  $^{13}\text{C}$  NMR spectra of compound **1c**.

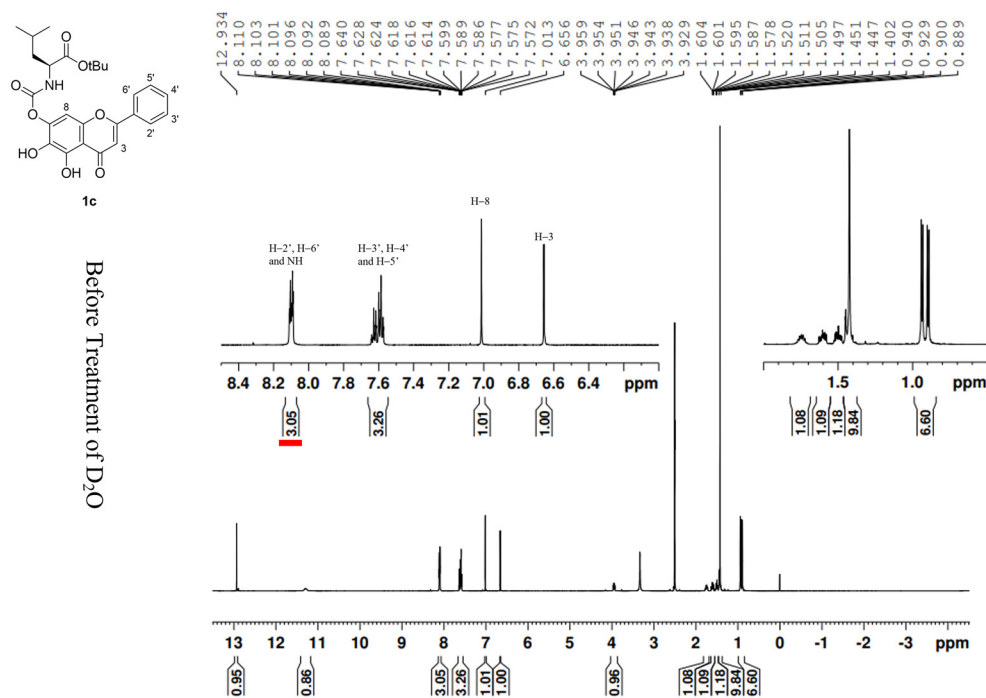

Figure S3.  $^1\text{H}$  NMR spectra of compound **1c** measured in DMSO before the treatment of  $\text{D}_2\text{O}$  at 600 MHz.

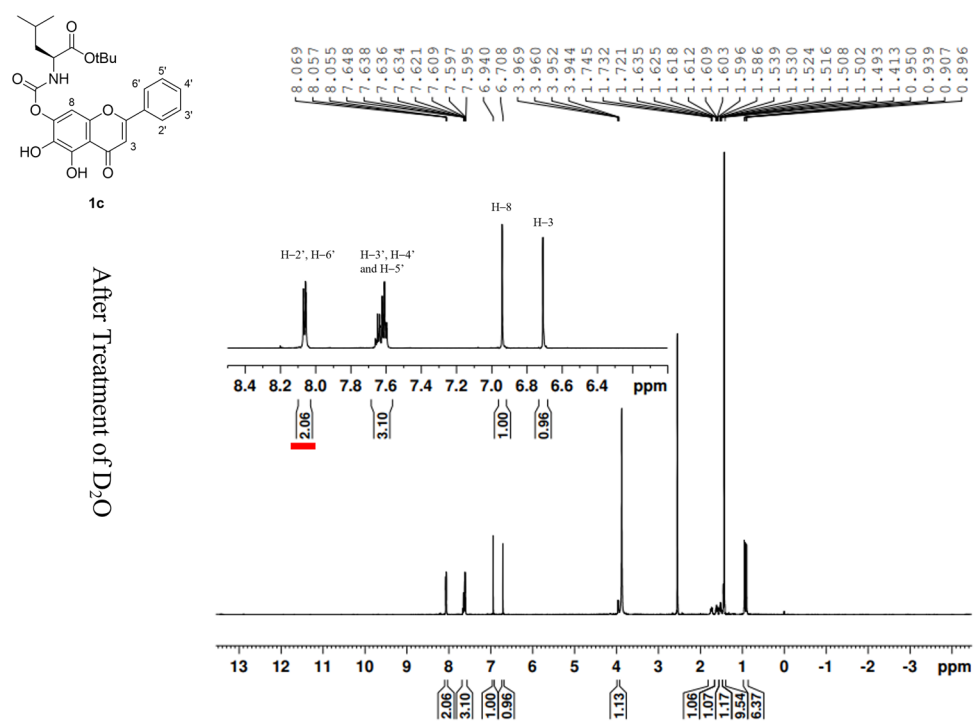

**Figure S4.** <sup>1</sup>H NMR spectra of compound **1c** measured in DMSO after the treatment of D<sub>2</sub>O at 600 MHz.

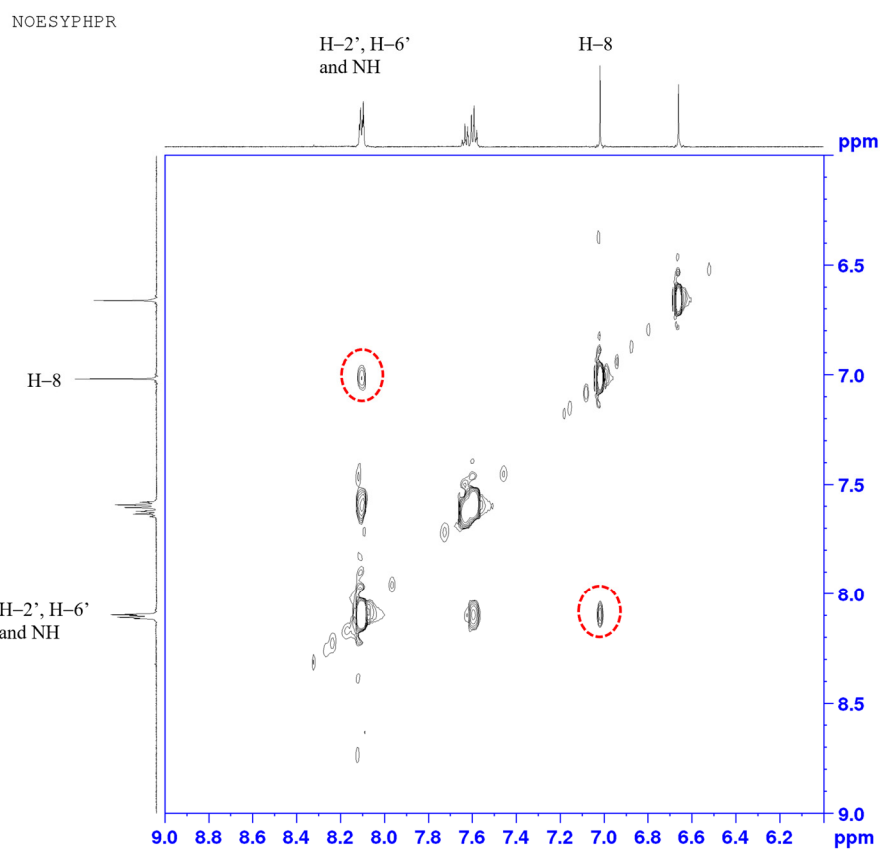

**Figure S5.**  $^1\text{H}$  NOESY NMR spectra of compound **1c** measured in DMSO at 600 MHz.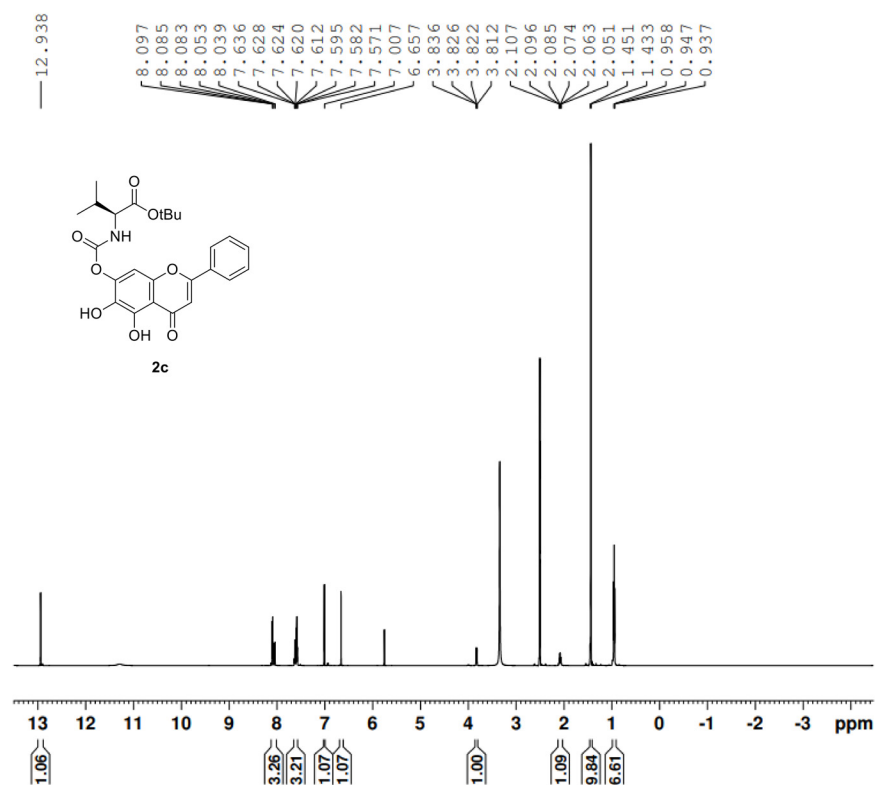**Figure S6.**  $^1\text{H}$  NMR spectra of compound **2c**.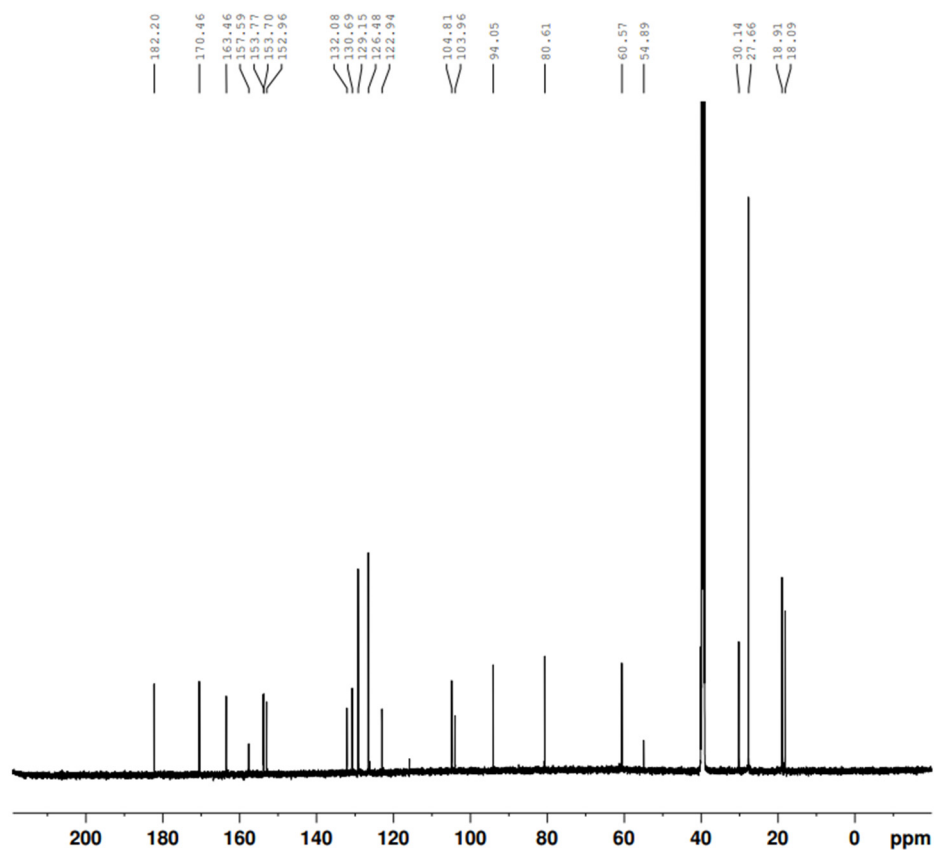

**Figure S7.**  $^{13}\text{C}$  NMR spectra of compound 2c.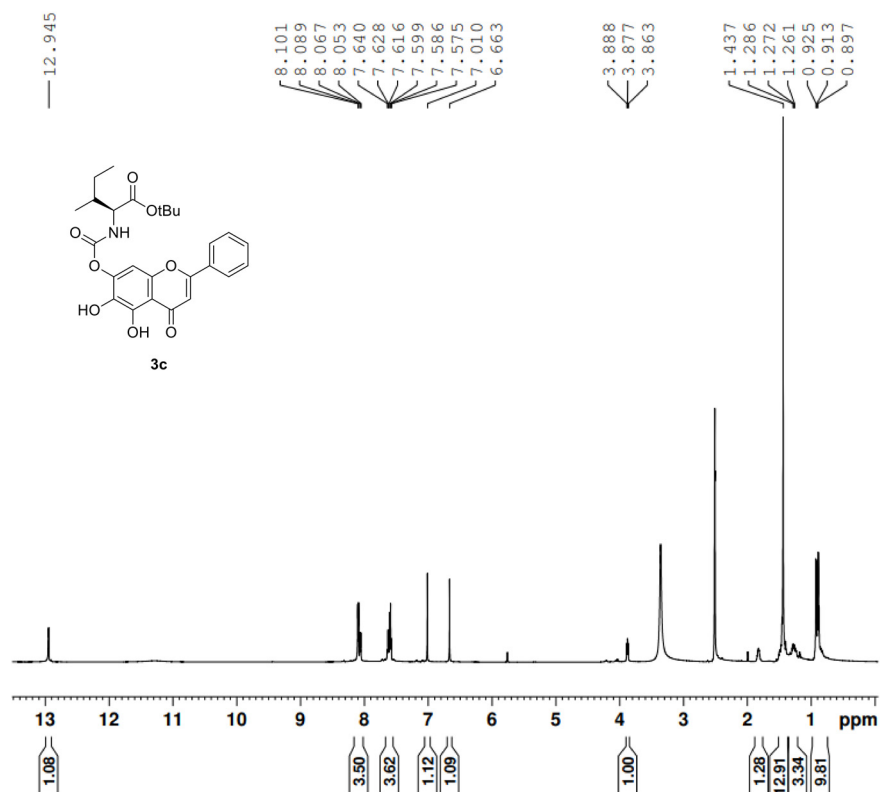**Figure S8.**  $^1\text{H}$  NMR spectra of compound 3c.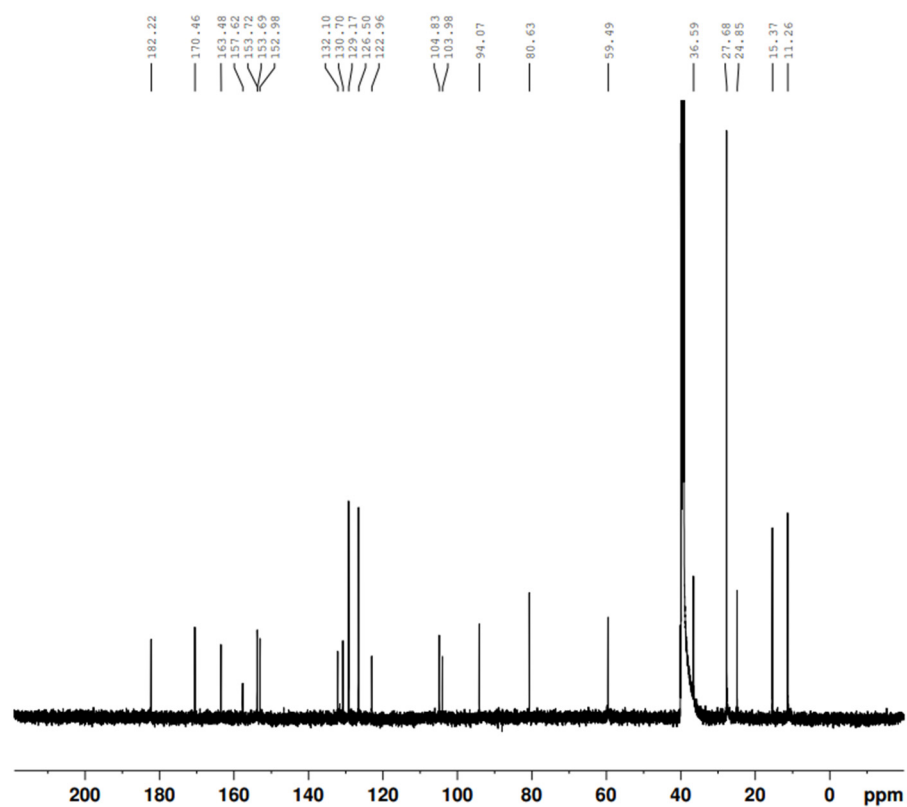

Figure S9.  $^{13}\text{C}$  NMR spectra of compound 3c.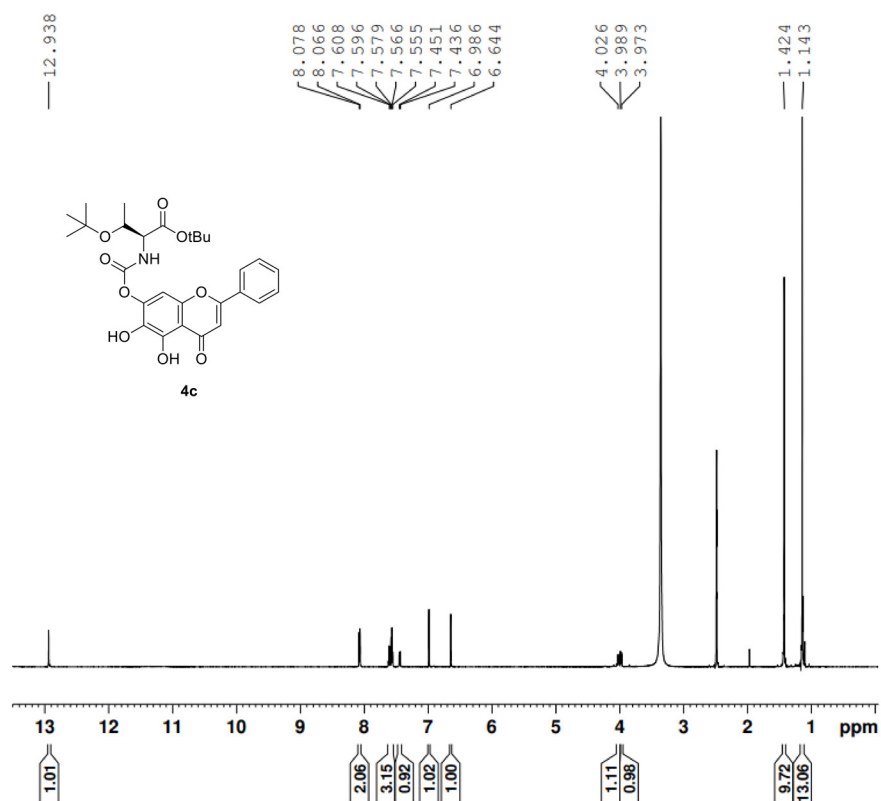Figure S10.  $^1\text{H}$  NMR spectra of compound 4c.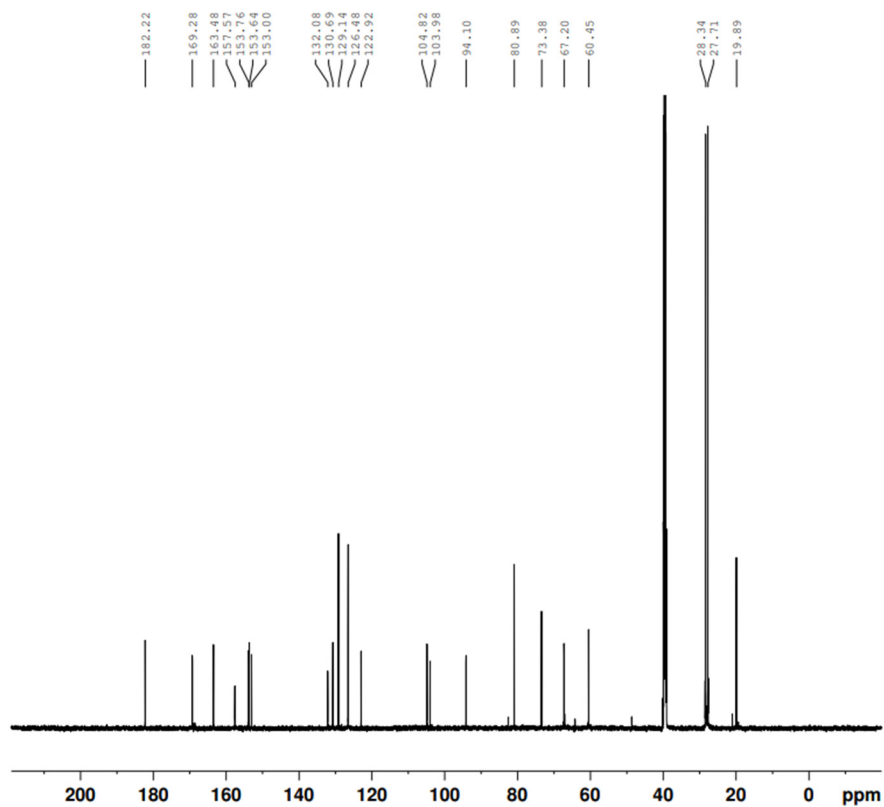

**Figure S11.**  $^{13}\text{C}$  NMR spectra of compound **4c**.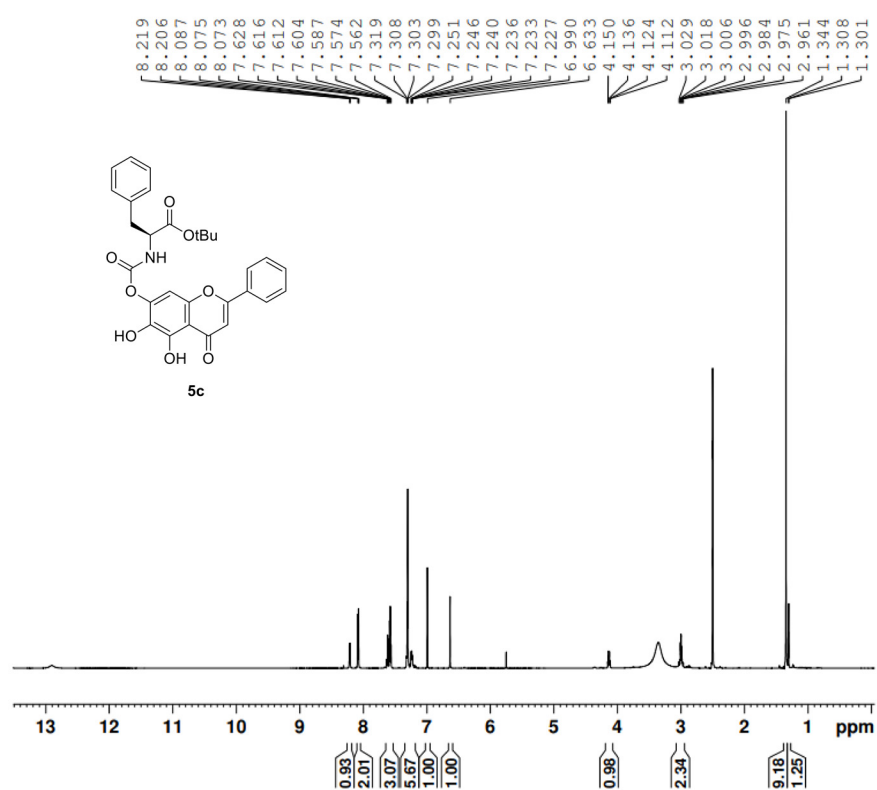**Figure S12.**  $^1\text{H}$  NMR spectra of compound **5c**.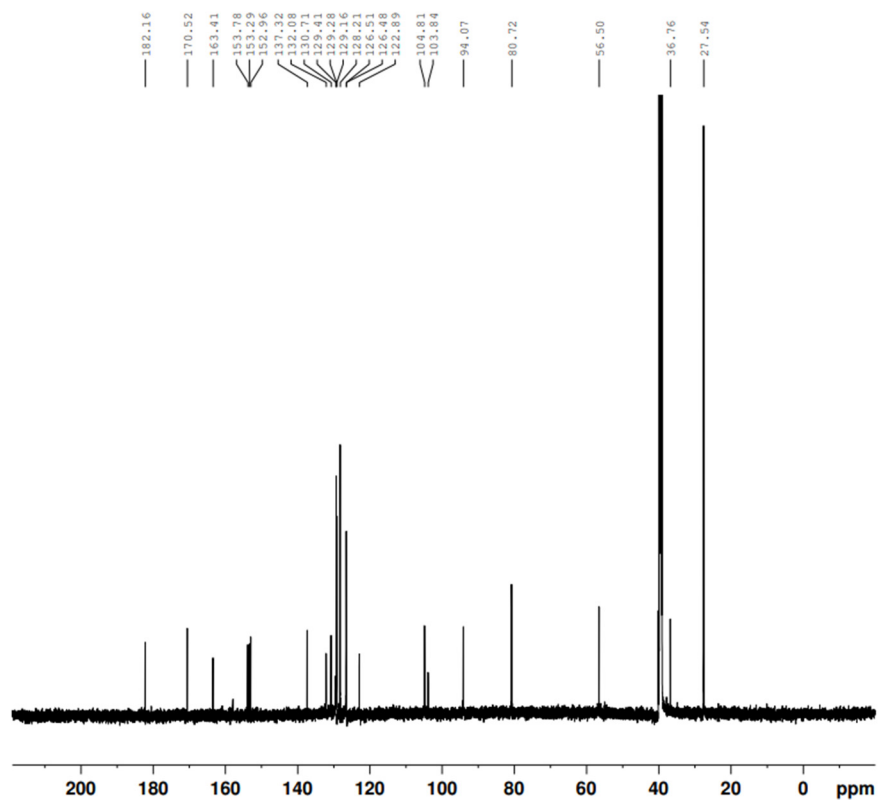**Figure S13.**  $^{13}\text{C}$  NMR spectra of compound **5c**.

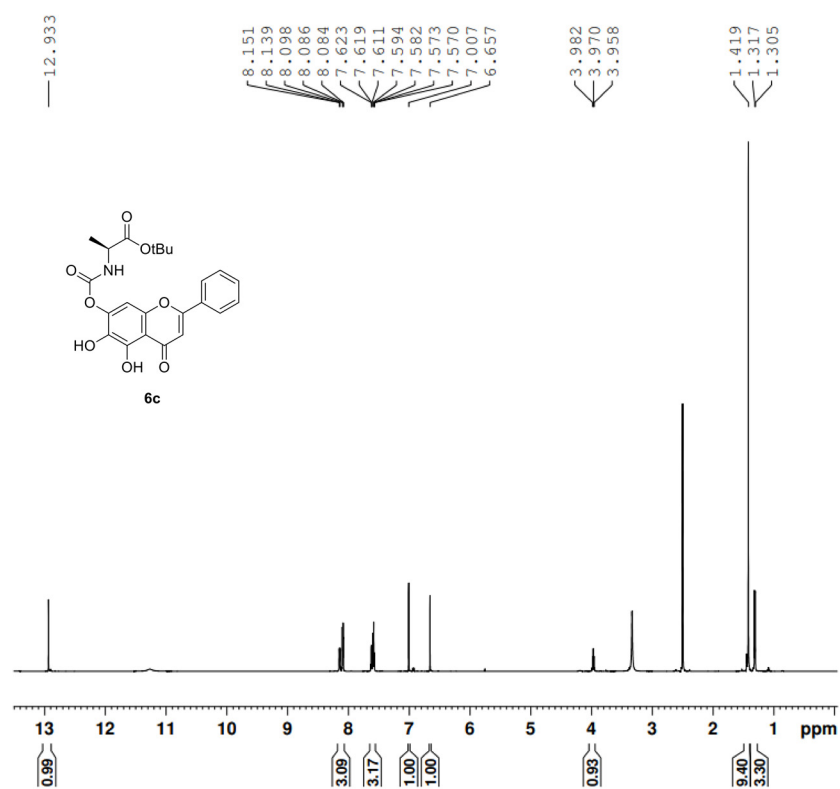Figure S14. <sup>1</sup>H NMR spectra of compound 6c.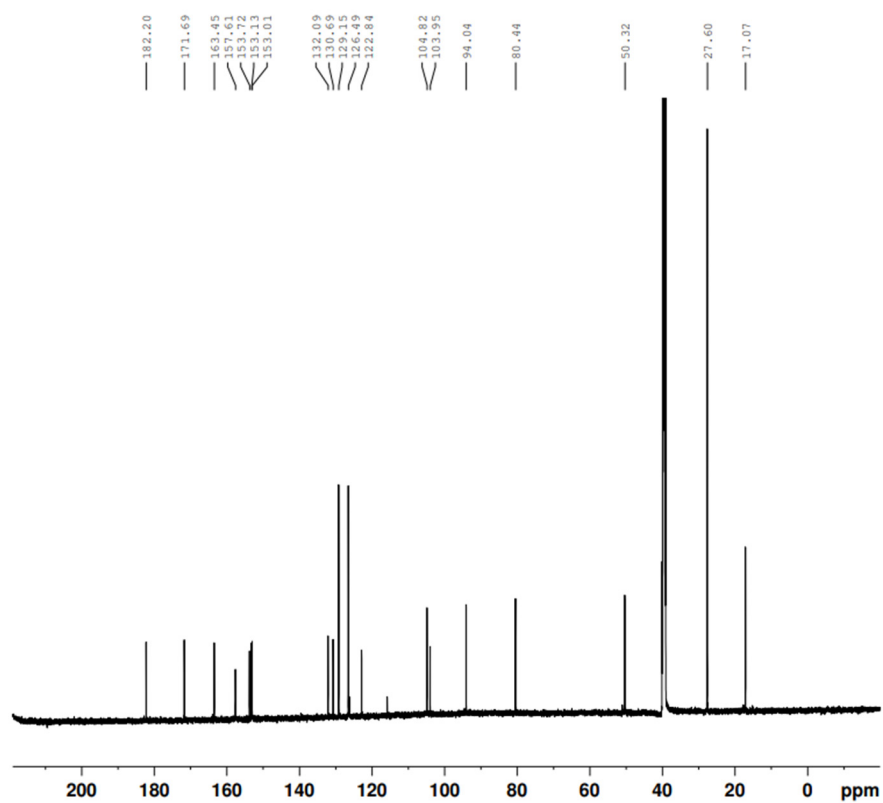Figure S15. <sup>13</sup>C NMR spectra of compound 6c.



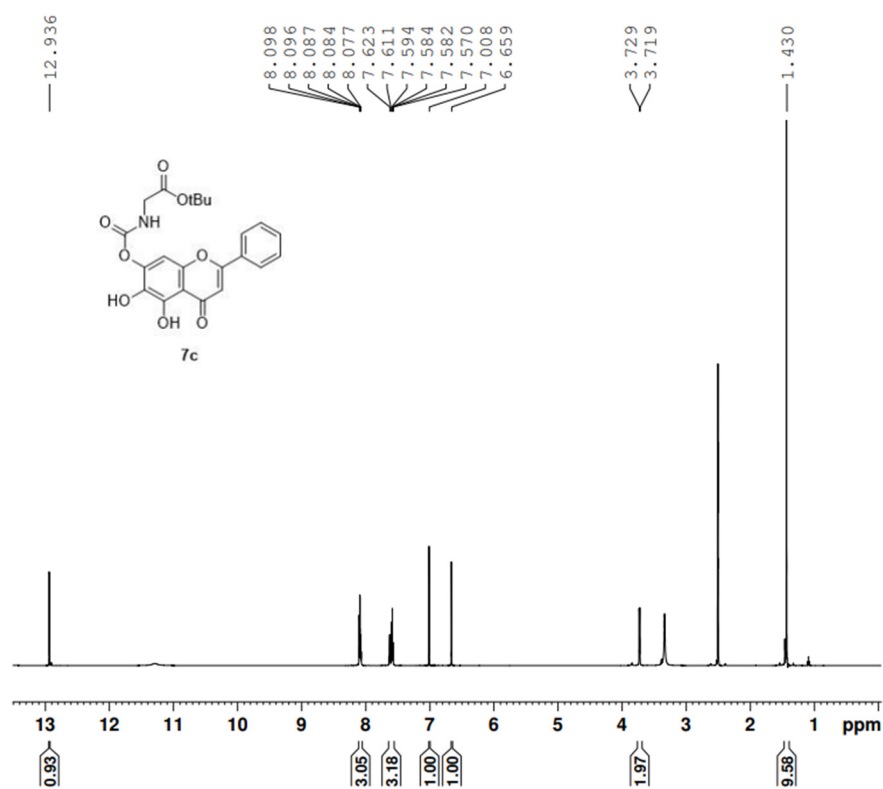Figure S16. <sup>1</sup>H NMR spectra of compound 7c.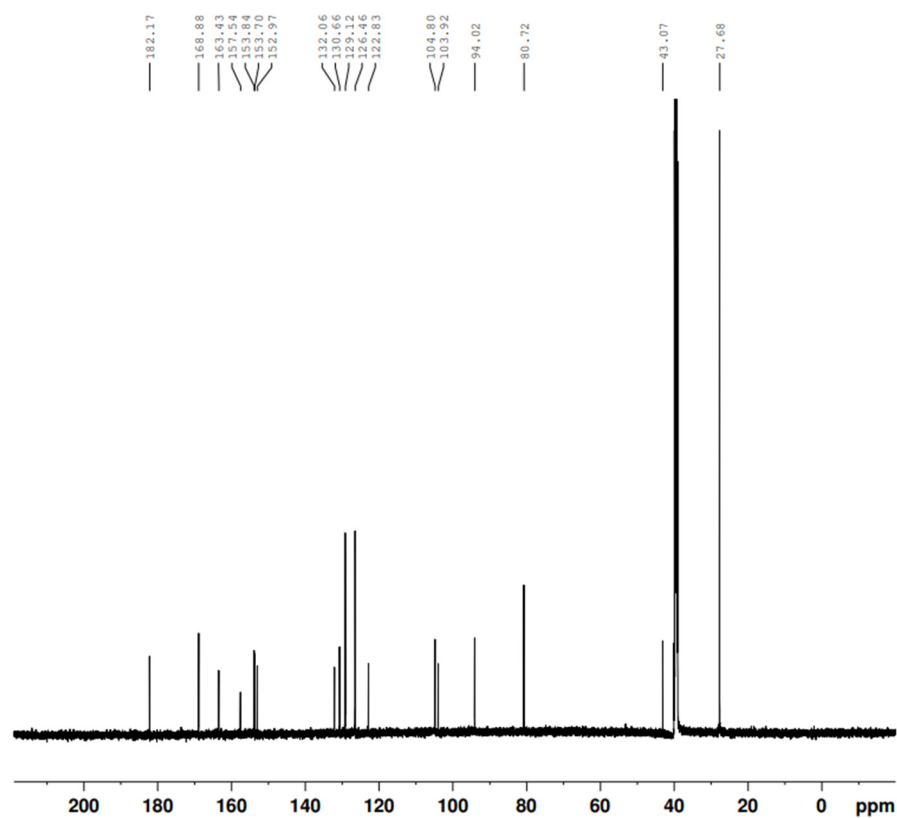Figure S17. <sup>13</sup>C NMR spectra of compound 7c.

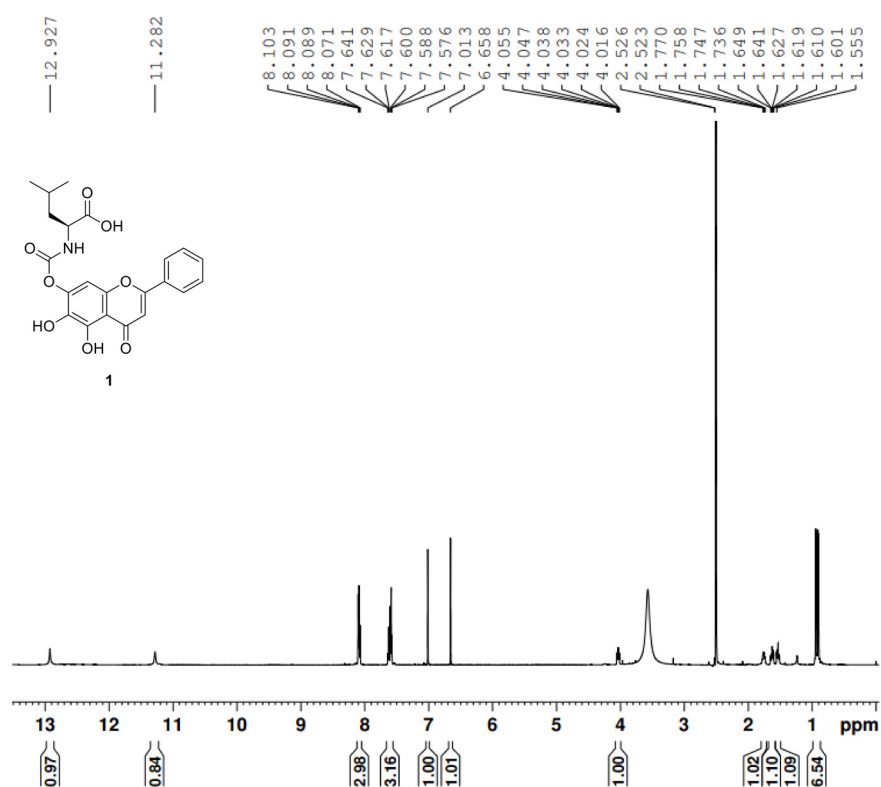Figure S18. <sup>1</sup>H NMR spectra of compound 1.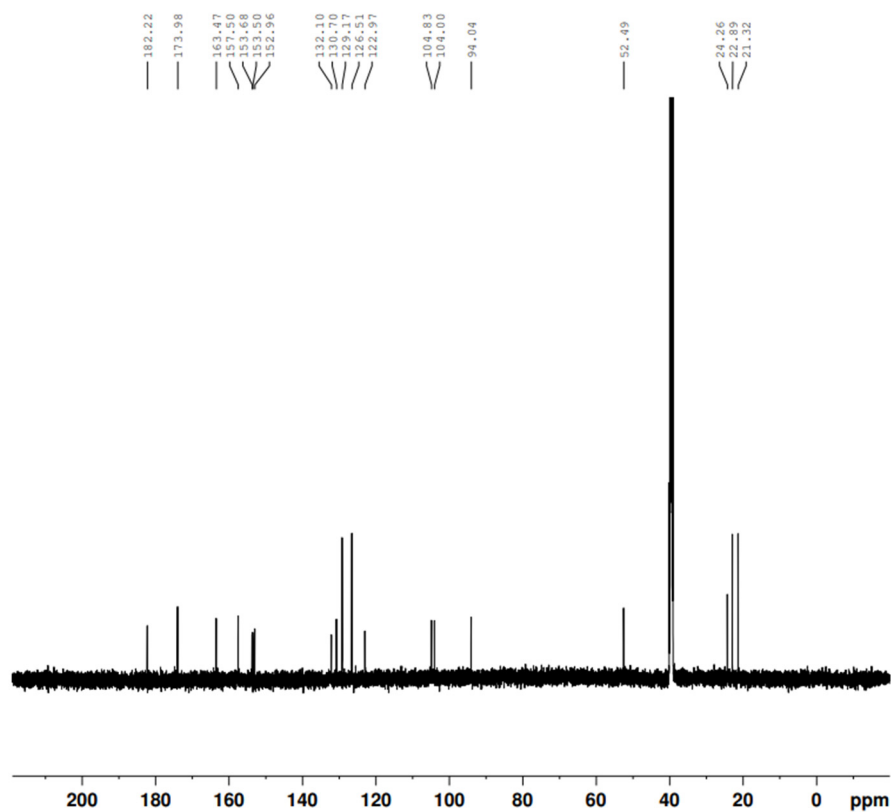Figure S19. <sup>13</sup>C NMR spectra of compound 1.

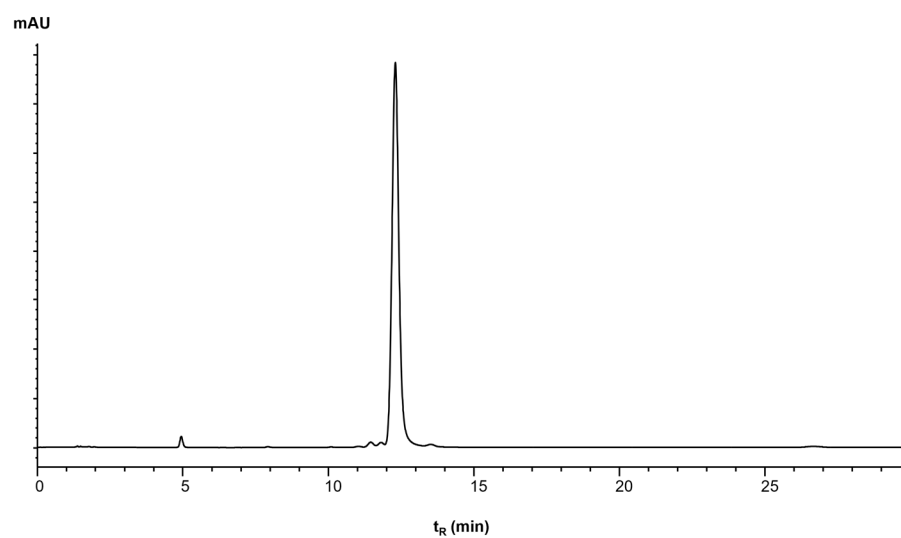

**Figure S20.** HPLC chromatogram of compound **1** eluted using Method C.

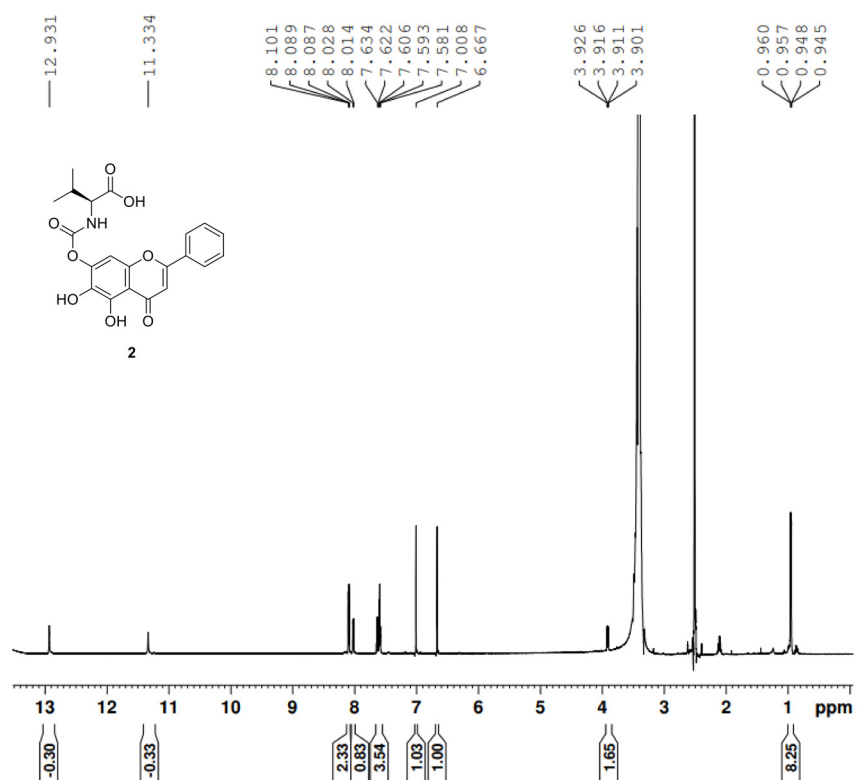

**Figure S21.** <sup>1</sup>H NMR spectra of compound **2**.

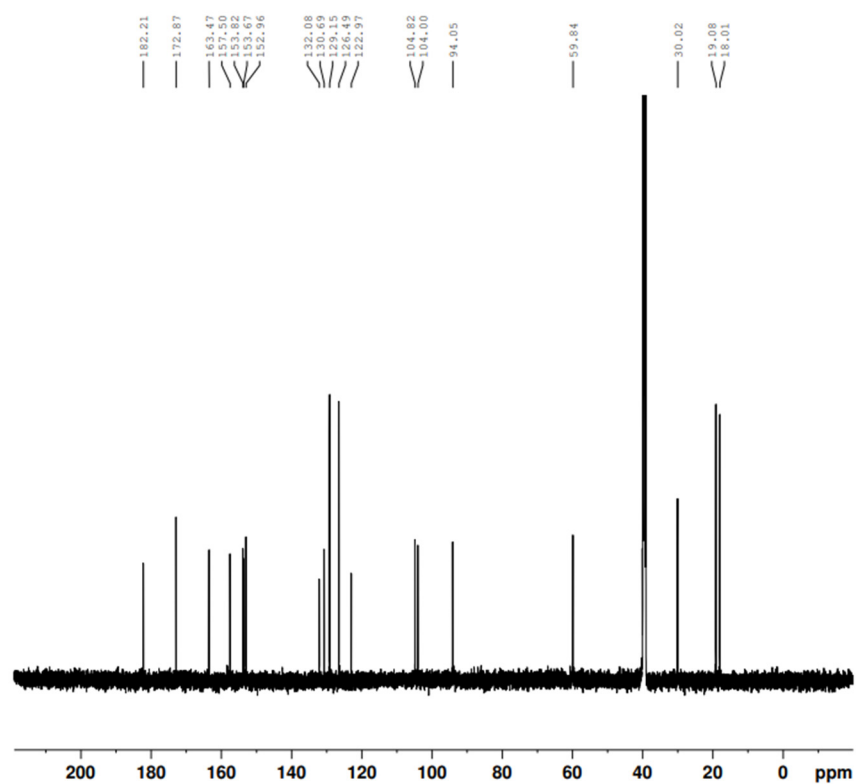

Figure S22.  $^{13}\text{C}$  NMR spectra of compound 2.

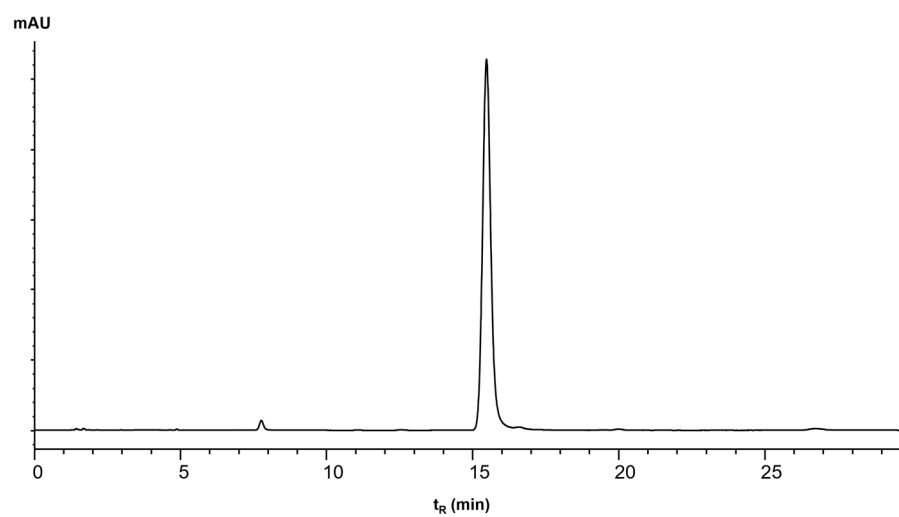

Figure S23. HPLC chromatogram of compound 2 eluted using Method C.

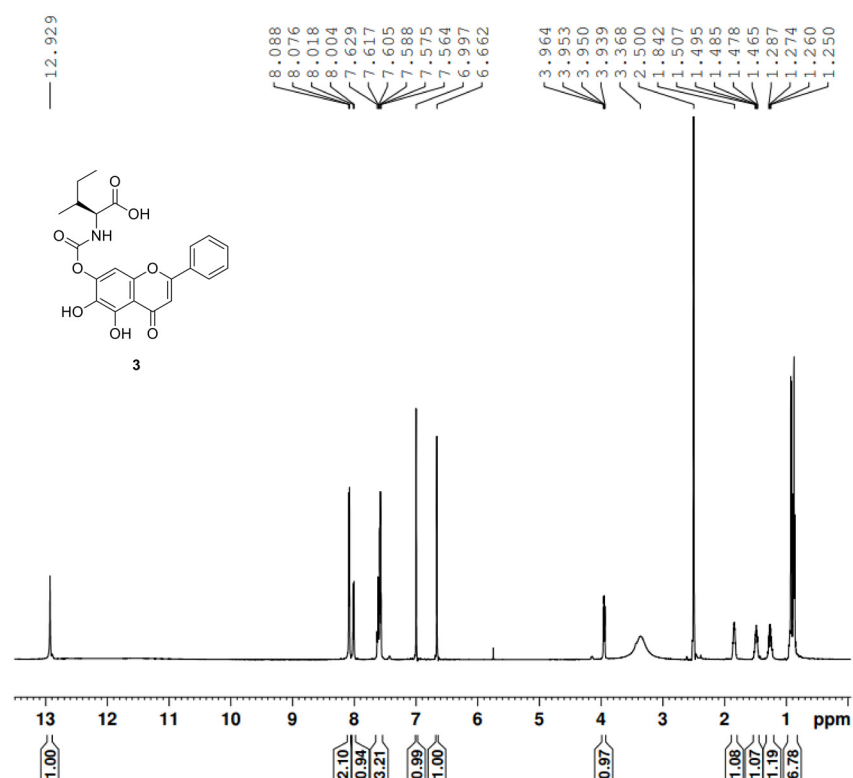Figure S24. <sup>1</sup>H NMR spectra of compound 3.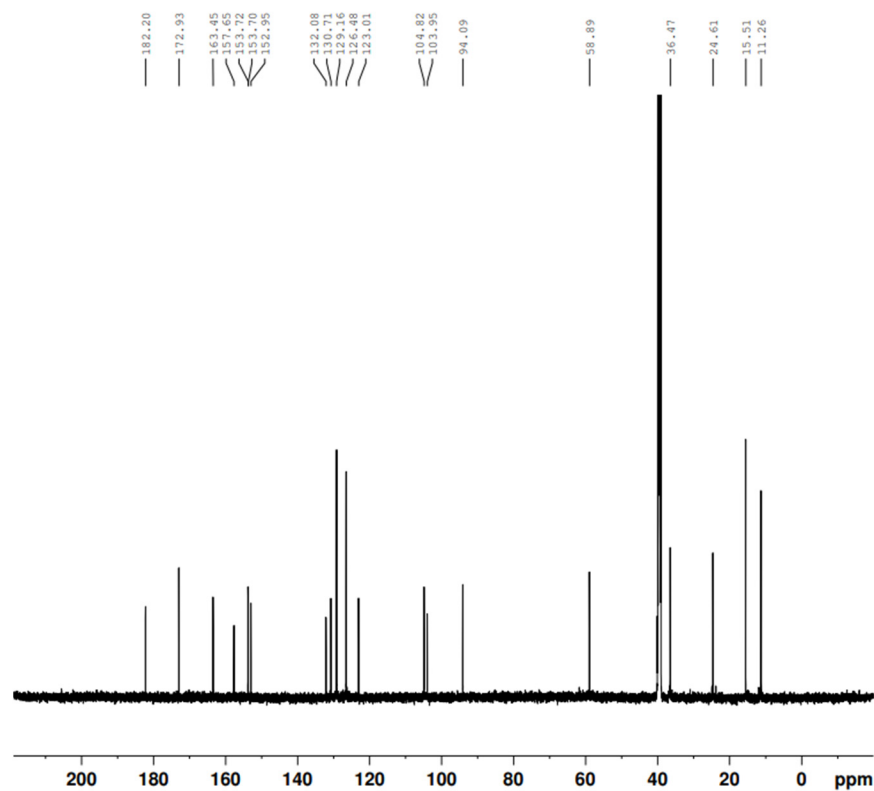Figure S25. <sup>13</sup>C NMR spectra of compound 3.

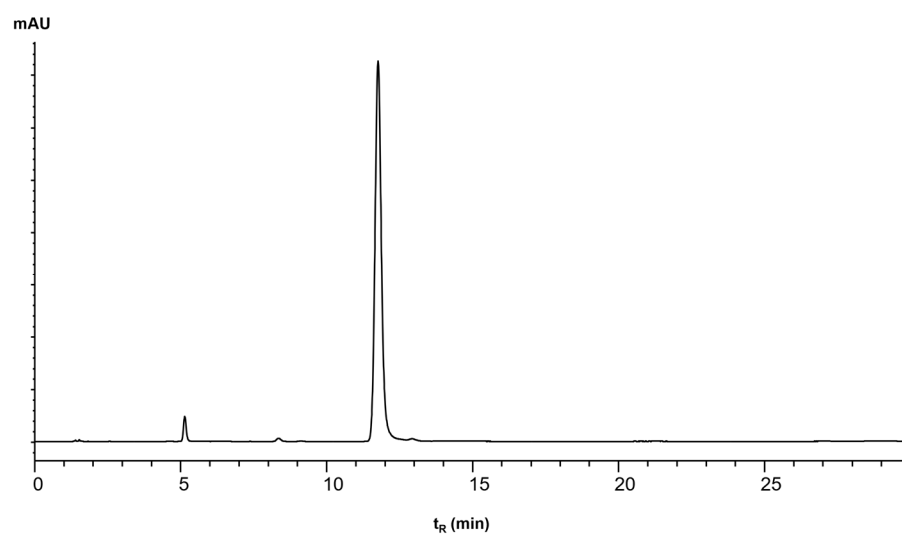

Figure S26. HPLC chromatogram of compound 3 eluted using Method C.

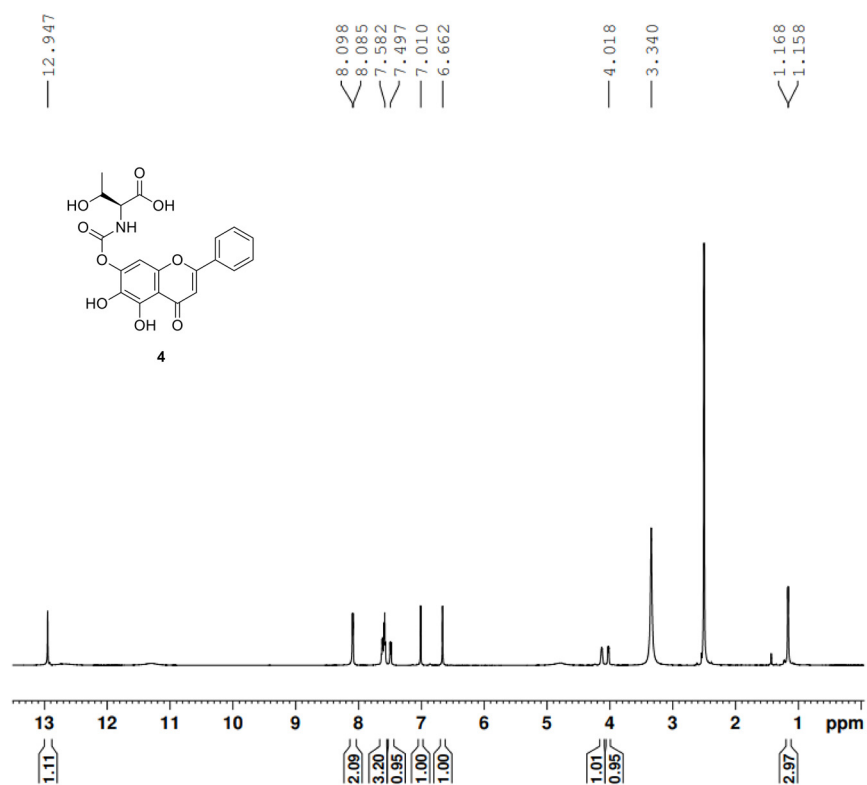

Figure S27. <sup>1</sup>H NMR spectra of compound 4.

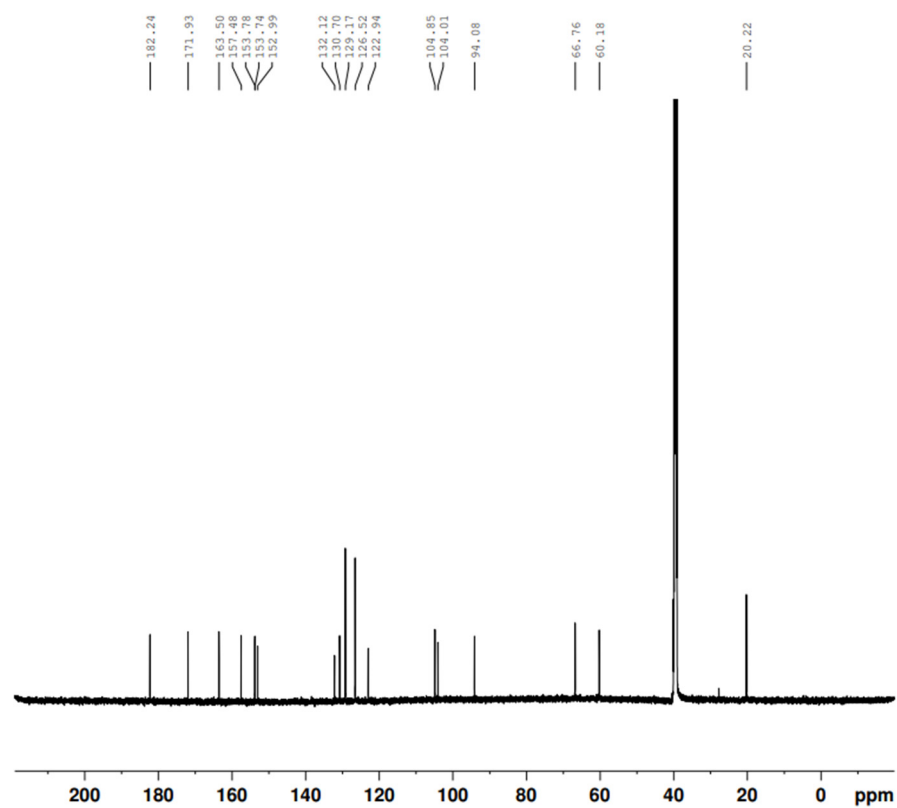

Figure S28. <sup>13</sup>C NMR spectra of compound 4.

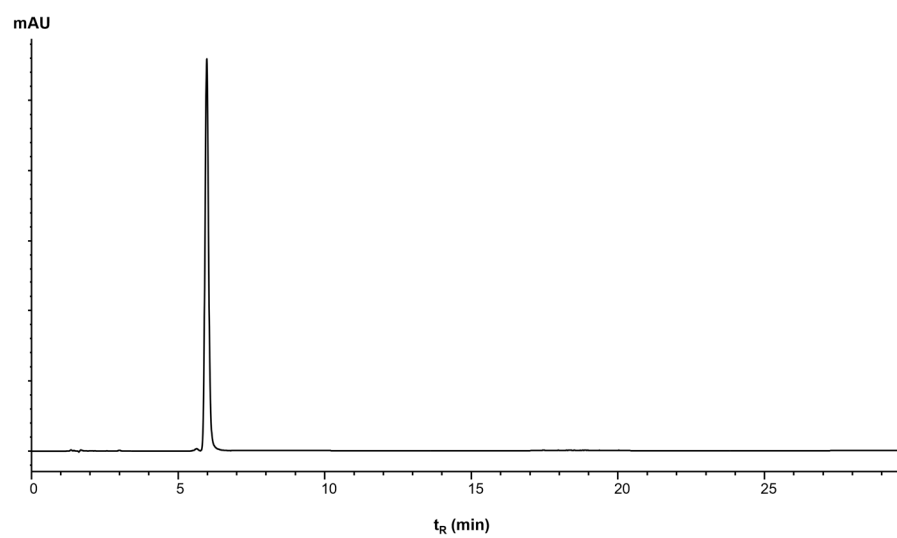

Figure S29. HPLC chromatogram of compound 4 eluted using Method B.

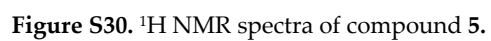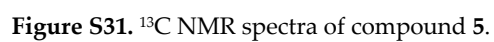



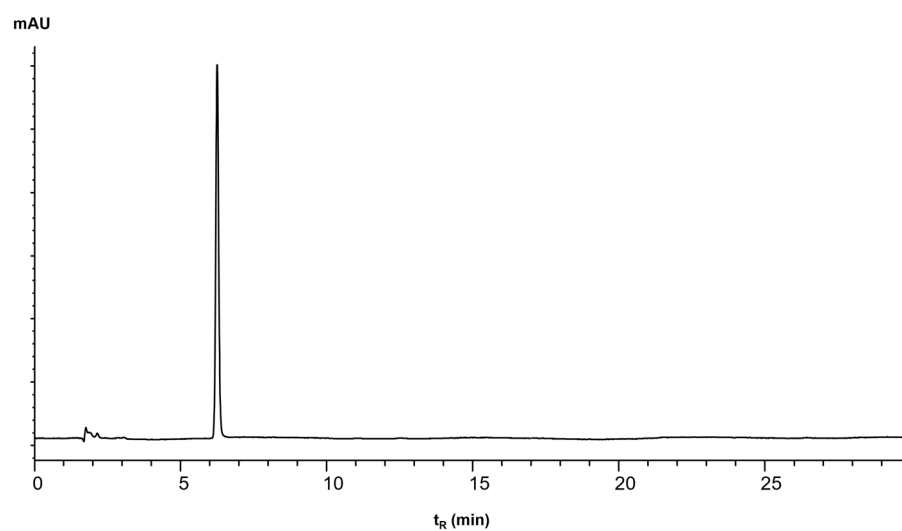

Figure S32. HPLC chromatogram of compound 5 eluted using Method A.

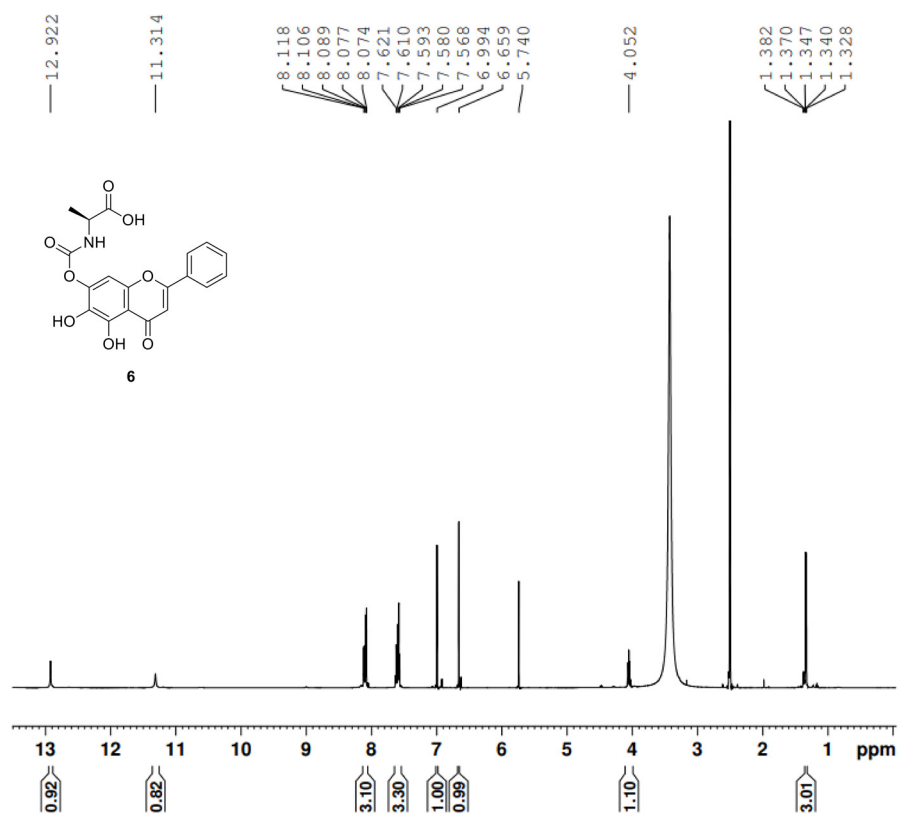

Figure S33. <sup>1</sup>H NMR spectra of compound 6.

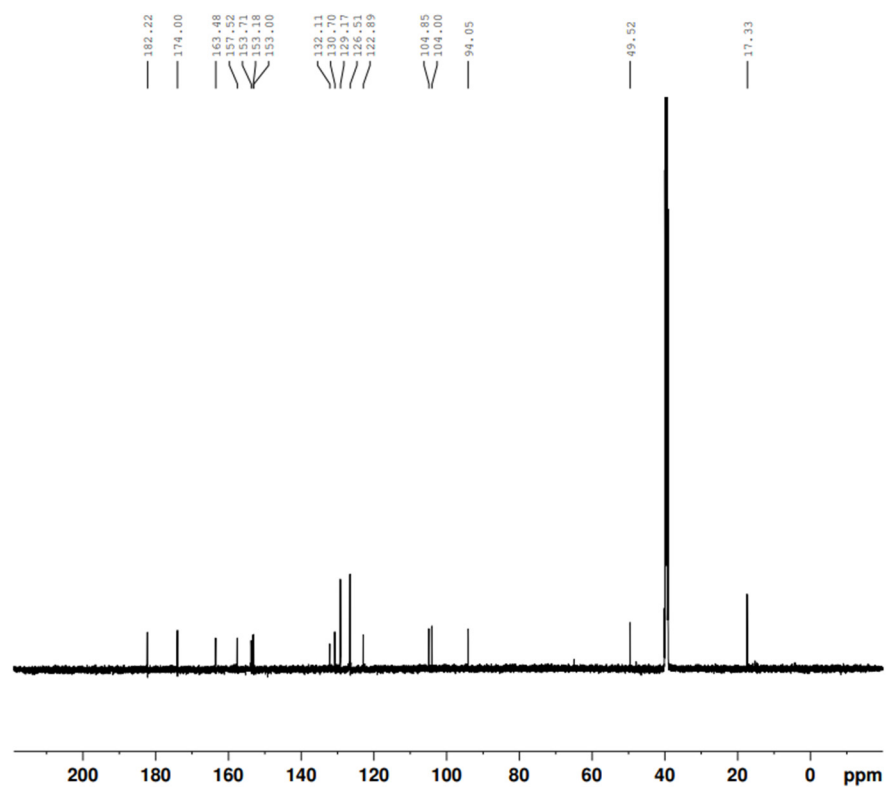

Figure S34. <sup>13</sup>C NMR spectra of compound 6.

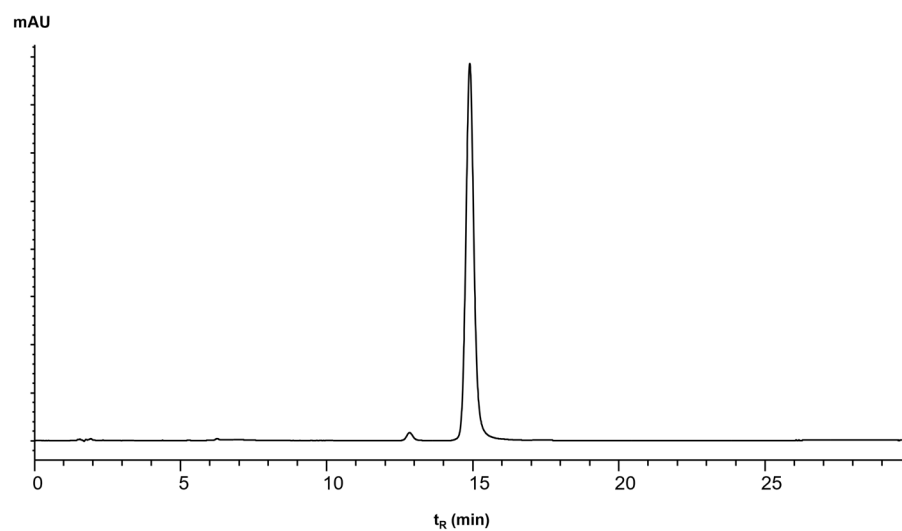

Figure S35. HPLC chromatogram of compound 6 eluted using Method A.

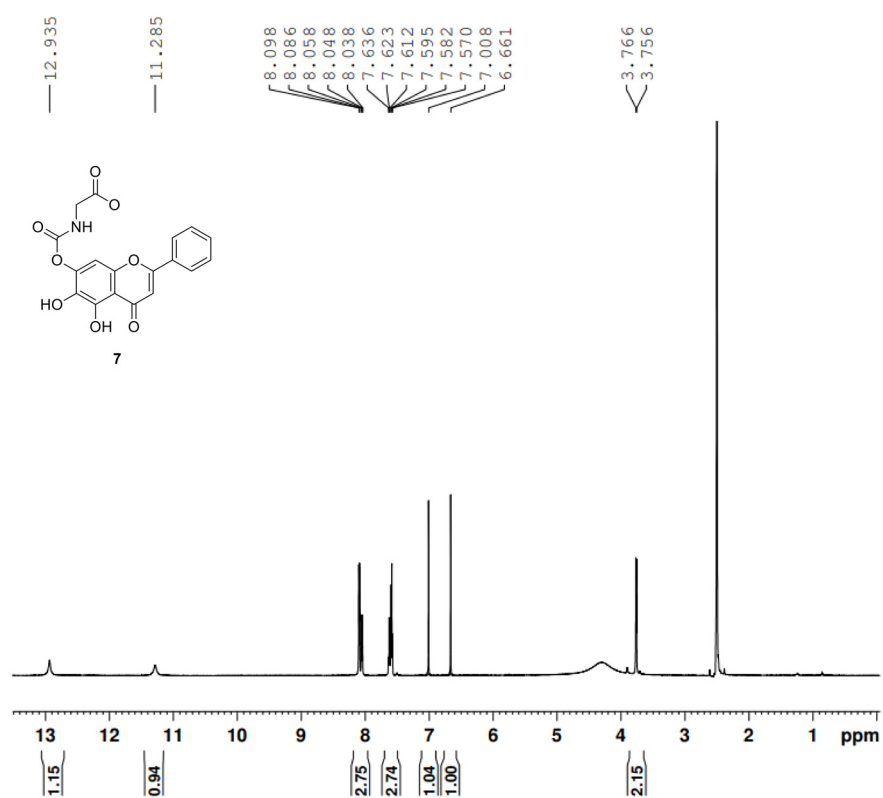Figure S36. <sup>1</sup>H NMR spectra of compound 7.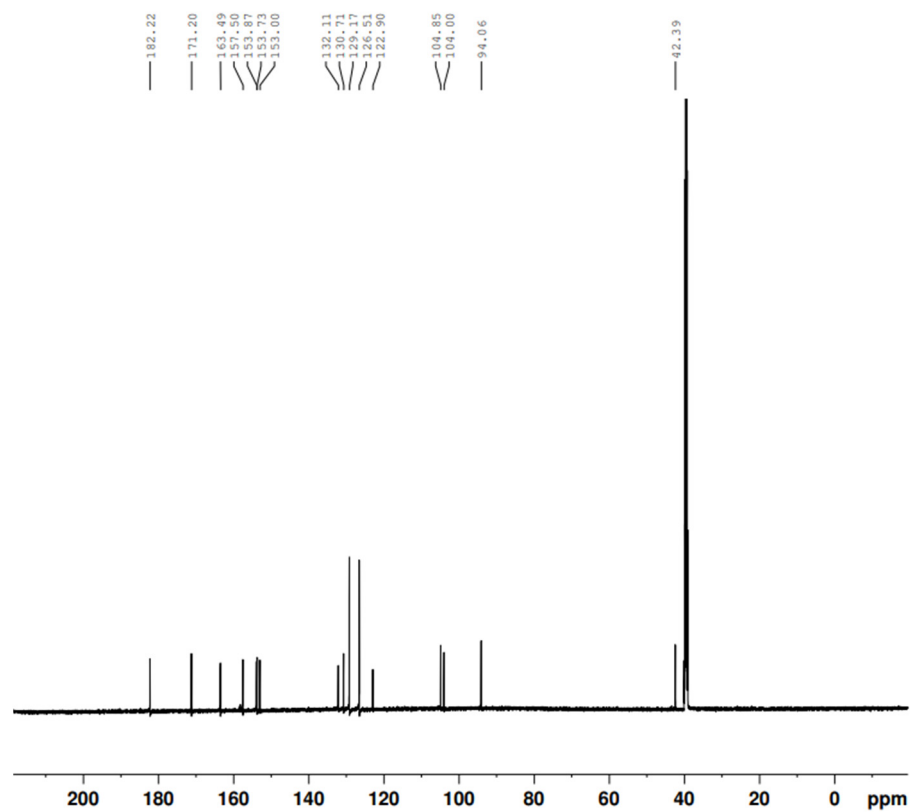Figure S37. <sup>13</sup>C NMR spectra of compound 7.

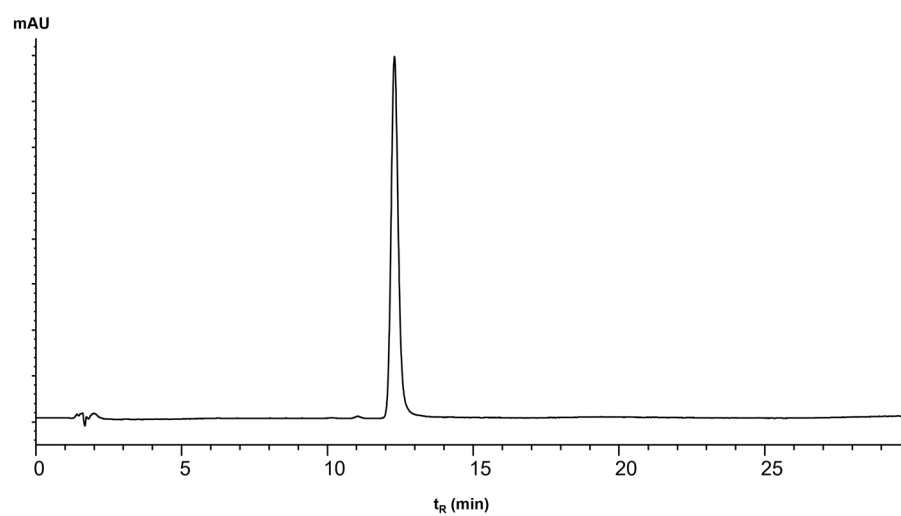

**Figure S38.** HPLC chromatogram of compound 7 eluted using Method A.
